# Supplementary material for: Genome-wide admixture and association study of subclinical atherosclerosis in the Women’s Interagency HIV Study (WIHS)
Source: PLoS One. 2017 Dec 4;12(12):e0188725. doi: 10.1371/journal.pone.0188725 (PMC5714351; doi:10.1371/journal.pone.0188725)
Supplement: S6 Table — *Publications before the year 2004 are represented in two reviews by Manolio TA 2004 and Pollex RL 2006. Two or more publications are referenced for some SNPs. Several SNP or gene associations were common across studies but are only presented once in the table. Publications in bold were the only studies that included a HIV-positive population. (XLSX) [file pone.0188725.s007.xlsx]

## Sheet: common CIMT SNPs
Table S6: List of SNPs previously significantly associated with cCIMT in candidate gene, genome-wide association or meta-analysis studies*
Publication	HIV status	Sex	Race/ethnicity	Gene	SNP
Shendre A 2017	Negative	Both	Blacks	SERGEF	17.765–17.980 Mb region
Hessler N 2016	Negative	Both	Whites	TRAF1	rs2416804
Natarajan P 2016; Debette S 2009; Manolio TA 2004	Negative	Both	Blacks	APOE	rs7412
			Blacks	KANK2	rs143873045
			Whites	KANK2	rs7188
			Whites, Blacks	LDLR	rs11668477
Chen Y 2015	Negative	Both	Asian	HBS1L	rs6569979
				SPTY2D1	rs11024756
Bis JC 2014	Negative	Both	Whites	ADAM19	rs141181941
				ASB10	rs1029952
				ASB10	rs1029955
				ATP2B1	rs17465916
				C11orf49	rs1471934
				CCDC71L	rs2286149
				FAM150B,TMEM18	rs146868851
				IL6R	rs6427641
				IL6R	rs6690230
				IL6R,SHE	rs11265621
				JAG1	rs2273061
				KIAA1486,IRS1	rs112111607
				LEPR	rs57941031
				MEF2C-AS1	rs116125929
				MEF2C,MIR3660	rs77243886
				MYB	rs7757388
				PRKAG2	rs4726047
				PRKAG2	rs6464147
				RHEB,PRKAG2	rs12703140
				SCN10A	rs12636153
				SCN10A	rs75559840
				SLC17A4	rs141877104
				SLC17A4	rs112544908
Markus H 2013	Negative	Both	Whites	HDAC9	rs2107595
				HDAC9	rs11984041
Melton PE 2013	Negative	Both	Mexican Americans	ABI3BP	rs2713758
				ABI3BP	rs6774218
				ABI3BP	rs7641631
				ABI3BP	rs17339226
				ABI3BP,IMPG2	rs16843153
				ABI3BP,IMPG2	rs16843185
				ACOXL	rs3789094
				ACOXL	rs3789096
				ACOXL	rs10496436
				ADAMTS2,RUFY1	rs1317022
				ADAMTS2,RUFY1	rs7718190
Yazdanpanah M 2006				ADD1	rs4961
				AFF1	rs19026
				AFF1	rs236675
				AFF1	rs342457
				AFF1	rs342458
				AFF1	rs342459
				AFF1	rs342461
				AFF1	rs342462
				AFF1	rs384059
				AFF1	rs447990
				AGTR1	rs16860271
				AHRR	rs2672745
				AJUBA	rs10130692
				APOC1	rs4420638
				ASIC2	rs902557
				ASIC2	rs11869615
				ATP9B	rs1105426
				ATP9B	rs3786181
				BBS9,BMPER	rs10246872
				BCL2	rs1545812
				BCL2	rs6567326
				BCL2	rs6567327
				BTC	rs4352548
				C12orf75	rs2888846
				C7orf66,EIF3IP1	rs711513
				C9orf72,LINGO2	rs10968026
				CACNA2D3	rs6445633
				CAPN10	rs11680323
				CCDC71L,PIK3CG	rs193740
				CD55	rs11120748
				CD58,IGSF3	rs1414272
				CDC42BPA,ZNF678	rs1495855
				CDC42BPA,ZNF678	rs2201570
				CDC42BPA,ZNF678	rs16847875
				CDC7,TGFBR3	rs1041159
				CDH13	rs1364309
				CDH13	rs12598803
				CDKAL1	rs201311
				CKM	rs7260463
				CMSS1,HP09053	rs793473
				CMTM6	rs17279984
				COL11A1	rs1763347
				COL11A1	rs2783567
				COL15A1	rs12335383
				COL1A2	rs4729129
				COL23A1	rs533024
				CSMD1	rs1714711
				CSMD1	rs1993679
				CSPG4	rs8041033
				CTDP1,LOC284241	rs552569
				DHRS3,AADACL4	rs12074804
				DPP10	rs6729737
				DSCAM	rs1571717
				EFNA5	rs153190
				ERLIN2	rs7017907
				ESR1	rs3798577
				EXOC3L2	rs17356664
				EXOC4	rs7798283
				FABP5,PMP2	rs11786920
				FAM155A	rs9555361
				FASTKD2	rs879472
				FASTKD2	rs3791984
				FASTKD2	rs12475891
				GATS,STAG3	rs17249588
				GDF10,PTPN20	rs4922532
				GLTSCR1L	rs9471934
				GOLPH3L	rs2055975
				GRHL2	rs523352
				GRIFIN,LFNG	rs11765273
				HDAC4	rs7582778
				HDGFL1,NRSN1	rs528782
				HEPHL1	rs11020631
				IL-6	rs7802442
				ILKAP,LOC151174	rs6722019
				INSIG2,LOC101927709	rs11123477
				IRX1,LOC101929153	rs7702251
				ISX-AS1,LOC105373015,LOC105373016	rs9610178
				JHDM1D-AS1,SLC37A3	rs10243409
				KCNIP4,LOC100505912	rs4235296
				KCNIP4,LOC100505912	rs13125869
				KPNA7,MYH16	rs17161640
				KRTDAP,DMKN	rs9973222
				LAMP5,LAMP5-AS1	rs6056659
				LASS6	rs6717260
				LINC-PINT	rs350655
				LINC00343	rs1328070
				LINC00443,FAM155A	rs288725
				LINC00693,RBMS3-AS3	rs4680793
				LINC01392,TFEC	rs11763839
				LINC01492,LOC101928523	rs4436177
				LINC01506,PIP5K1B	rs1412990
				LINC01582,FAM169B	rs2871596
				LINC01626,RIMS1	rs1328698
				LOC100505478,TNFSF15	rs12238270
				LOC100996455,SLC22A11	rs615311
				LOC100996455,SLC22A11	rs634497
				LOC100996455,SLC22A11	rs2845635
				LOC100996455,SLC22A11	rs6421690
				LOC100996455,SLC22A11	rs7131675
				LOC100996455,SLC22A11	rs11231803
				LOC101928476,PRMT6	rs17457845
				LOC101928851,NONE	rs7693389
				LOC101929681,CDH6	rs4867041
				LOC102723427,LOC100507468	rs10248387
				LOC105369342	rs4930402
				LOC105369342	rs7940108
				LOC105369957	rs11112499
				LOC105369957	rs11112502
				LOC105371609	rs4411179
				LOC105371664	rs10921198
				LOC105373274	rs6657143
				LOC105373414	rs328632
				LOC105374455	rs10173176
				LOC105374455,LOC107985864	rs13386750
				LOC105375840	rs7840228
				LOC105375841	rs4523231
				LOC105375841	rs4738881
				LOC105375841	rs12545082
				LOC105375841	rs13272749
				LOC105375841	rs16920345
				LOC105375841,SOX17	rs10099341
				LOC105375856	rs1436022
				LOC105375856	rs1436023
				LOC105375856	rs4738639
				LOC105375856	rs11784185
				LOC105375856	rs13250896
				LOC105375856	rs13253940
				LOC105375856	rs13273087
				LOC107985919	rs10207116
				LOC107985919	rs11901495
				LOC107987107,TMEM38B	rs3817141
				LOC283177,NONE	rs2187466
				LOC283177,NONE	rs3017965
				LOC400940,LINC01247	rs2609126
				LOC400940,LINC01247	rs2609135
				LOC642587	rs2225933
				LRRK1	rs8037913
				LTBR,CD27-AS1	rs4764589
				LYN	rs13249338
				MAP3K8	rs8176984
				MARK4	rs11672894
				MBL2	rs12412945
				MCC	rs17135370
				MCM5	rs4645742
				MEAT6,C6orf118	rs7752478
				MEAT6,C6orf118	rs7772470
				MIR4268,EPHA4	rs1002827
				MIR4447,LINC00901	rs7614031
				MIR622	rs16944443
				MRPL15,SOX17	rs1504749
				MRPL15,SOX17	rs6987174
				MRPL15,SOX17	rs7834421
				MRPL15,SOX17	rs10958409
				MRPL15,SOX17	rs12543193
				MTCL1	rs564629
				MTCL1	rs566890
				MTCL1	rs689801
				NOS1	rs3741475
				NPR1	rs2785245
				NRG1	rs1393952
				ODF3L1	rs4886734
				OLFM3	rs4907957
				OLFM3,COL11A1	rs10874639
				OTOGL	rs10862084
				PCAT5,ANKRD30A	rs11010409
				PCK1	rs6025645
				PCSK2	rs1582183
				PDE4D	rs1457145
				PIK3CG	rs42162
				PIK3CG	rs1526083
				PIK3CG,PRKAR2B	rs6966290
				PLAT	rs2070713
				PLCB1	rs6086582
				PLCB1	rs6086590
				PLCB1	rs13040543
				PLCB1	rs13041711
				PON1	rs3917498
				PON2	rs10240398
				PPARG	rs2959272
				PPARGC1B	rs1012543
				PPM1H	rs337515
				PPM1H	rs2641558
				PRKCDBP	rs1488864
				RBFOX2,APOL3	rs2413378
				RP1	rs7010943
				RP4-782L23.1	rs9436605
				RPRM,GALNT13	rs10497135
				RYR3	rs2278309
				SH3GL2	rs1970064
				SLC26A7,RUNX1T1	rs4435678
				SLC35D2	rs10126039
				SLC35D2	rs10990690
				SOX17	rs12234926
				SOX17	rs12234941
				SOX17	rs12541742
				SVIL,KIAA1462	rs2989430
				SYNJ2	rs1744178
				TECRL,LOC401134	rs2348848
				TEX29,LINC00354	rs1151444
				TGFB2	rs11118125
				TMCO5	rs10162808
				TMEM182,LOC100287010	rs11890236
				TMEM261,PTPRD	rs1360583
				TMEM261,PTPRD	rs12238899
				TMEM38B	rs10816302
				TMEM38B,MIR8081	rs10816332
				TMPRSS2	rs2094881
				TMPRSS2	rs2104810
				TOX,CA8	rs2611348
				TOX,CA8	rs12541924
				TRPM1	rs783026
				TSG1,MANEA-AS1	rs1408934
				TSG1,MANEA-AS1	rs9342406
				TUSC3	rs17474411
				TUSC3	rs373806
				TXNL1	rs1541501
				WTIP,SCGB1B2P	rs2199639
				ZFAND5	rs11143274
				ZFAND5,TMC1	rs17580427
				ZNF703	rs10955028
				ZNF80,TIGIT	rs1354350
Shendre A 2013	Positive	Women	Whites, Blacks and Hispanic	RYR3	rs2291736
			Whites	RYR3	rs11856930
			Blacks	RYR3	rs2572204
			Hispanics	RYR3	rs62012610
				RYR3	rs877087
				RYR3	rs2077268
Zhao J 2013	Negative	Both	Whites	LTA4H	rs61937881
				LTA4H	rs1978331
				LTA4H	rs17677715
				LTA4H	rs2660899
				LTA4H	rs2540482
				LTA4H	rs2660845
Wang L 2012	Negative	Both	Dominican Republican	AOAH	rs2001600
				CCDC88C	rs17803546
				FOXN3	rs10144627
				FOXN3	rs10151997
				FOXN3	rs10151430
				PRIMA1	rs7152362
Bis JC 2011	Negative	Both	Whites	ADAMTS7	rs3825807
				APOC1	rs445925
				COL4A2	rs4773144
				LDLR	rs1122608
				PINX1	rs6601530
				PPAP2B	rs17114036
				SLC17A4	rs4712972
				ZHX2	rs11781551
Rahman TJ 2011	Negative	Both	Whites	H6PD	rs17368528
Wassel CL 2011	Negative	Both	Blacks	ADIPOQ	rs2241767
Kiechl S 2010	Negative	Both	Whites	CXCL12	rs501120
Shrestha S 2010	Positive	Men	Whites	RYR2	rs12046077
				RYR3	rs2229116
				RYR3	rs7177922
				RYR3	rs2291734
Debette S 2009	Negative	Both	Whites	CX3CL1	rs170364
				CX3CL1	rs614230
				CX3CR1	rs11129820
				CX3CR1	rs3732378
Goodarzi MO 2009	Negative	Both	Hispanic Americans	CAPN10	rs2975762
				CAPN10	rs5030952
				CAPN10	rs2975760
				CAPN10	rs3792267
Liao Y 2008	Negative	Both	Hispanic/Latino	CXCL12	rs2297630
				NOS1	rs2293050
				PLAT	rs879293
				SCNN1B	rs152740
				SELP	rs3766126
				THBS1	rs2292305
Dumont J 2007	Negative	Men	Whites	ARG1	rs2781666
				OAZ1	rs2074458
O'Donnell CJ 2007	Negative	Both-stratified	Whites	C20orf196	rs6053733
				CACNA2D3	rs1997463
				CCR5	rs3762823
				ESR1	rs3778099
				LOC10042152,LOC645321	rs1039610
				LOC10042152,LOC645321	rs1587893
				LOC105371953	rs304409
				LOC105374659,RPS23P5	rs28207
				LOC107985456,LOC647132	rs1400544
				MYOID	rs2470209
				PCSK2	rs4814615
				PLXNA4	rs6944400
				PRPF4B	rs853406
				PRPF4B	rs853407
				TMEM132B	rs2214959
				VEPH1	rs1581413
Coll B 2006	Positive	Both	Whites	MCP-1	rs1024611
Pollex RL 2006; Iemitsu M 2014	Negative	Both	Diverse racial groups	ADRB3	rs4994
				APOB	rs693
Manolio TA 2004				APOC3	rs5128
Manolio TA 2004				APOC3	rs4520
Manolio TA 2004				APOC3	rs4225
				CYBA	rs4673
				eNOS	rs2070744
Bhuiyan AR 2007				eNOS	rs1799983
Manolio TA 2004				F5	rs6025
Manolio TA 2004				FGB	rs1800790
				GPX1	rs1050450
				HTR2A	rs6313
				HTR2A	rs6311
				IL1B	rs1143627
				IL6	rs1800797
				IL6	rs1800795
				IL6	rs1800796
Manolio TA 2004				ITGB3	rs5918
Manolio TA 2004				MTHFR	rs1801133
				OPG	rs2073617
				PAI	rs1799889
				PCK1	rs2071023
				PLA2G7	rs1805017
				PLA2G7	rs76863441
				PLA2G7	rs1051931
Manolio TA 2004				PON1	rs662
Manolio TA 2004				PON1	rs854560
				PON1	rs705381
				PON1	rs854572
				PON1	rs854571
				PON1	rs705379
				PON1	rs705380
				PPARG	rs1801282
				PPARG	rs3856806
Manolio TA 2004				TLR4	rs4986790
Manolio TA 2004				TLR4	rs4986791
				TNFRSF1A	rs4149584
				UCP2	rs659366
Coll B 2004	Positive	Both	Whites	SDF-1	rs1801157
Manolio TA 2004	Negative	Both	Diverse racial groups	AGT	rs699
				AGT	rs5050
				AGT	rs5051
				ALOX5	rs3780901
				ALOX5	rs3780906
				ALOX5	rs1059696
				CETP	rs5882
				MMP3	rs3025058
*Publications before the year 2004 are represented in two reviews by Manolio TA 2004 and Pollex RL 2006.
Two or more publications are referenced for some SNPs. Several SNP or gene associations were common across studies but are only presented once in the table.
Publications in bold were the only studies that included a HIV-positive population
